# Supplementary material
Source: PubMed Central journal article supplement (PMC3668668)
Supplement: 77.2.277_zmr999092331so1.pdf [file 77.2.277_zmr999092331so1.pdf]

# Acyltransferases in Bacteria by Annika Röttig and Alexander Steinbüchel

## SUPPLEMENTARY MATERIAL

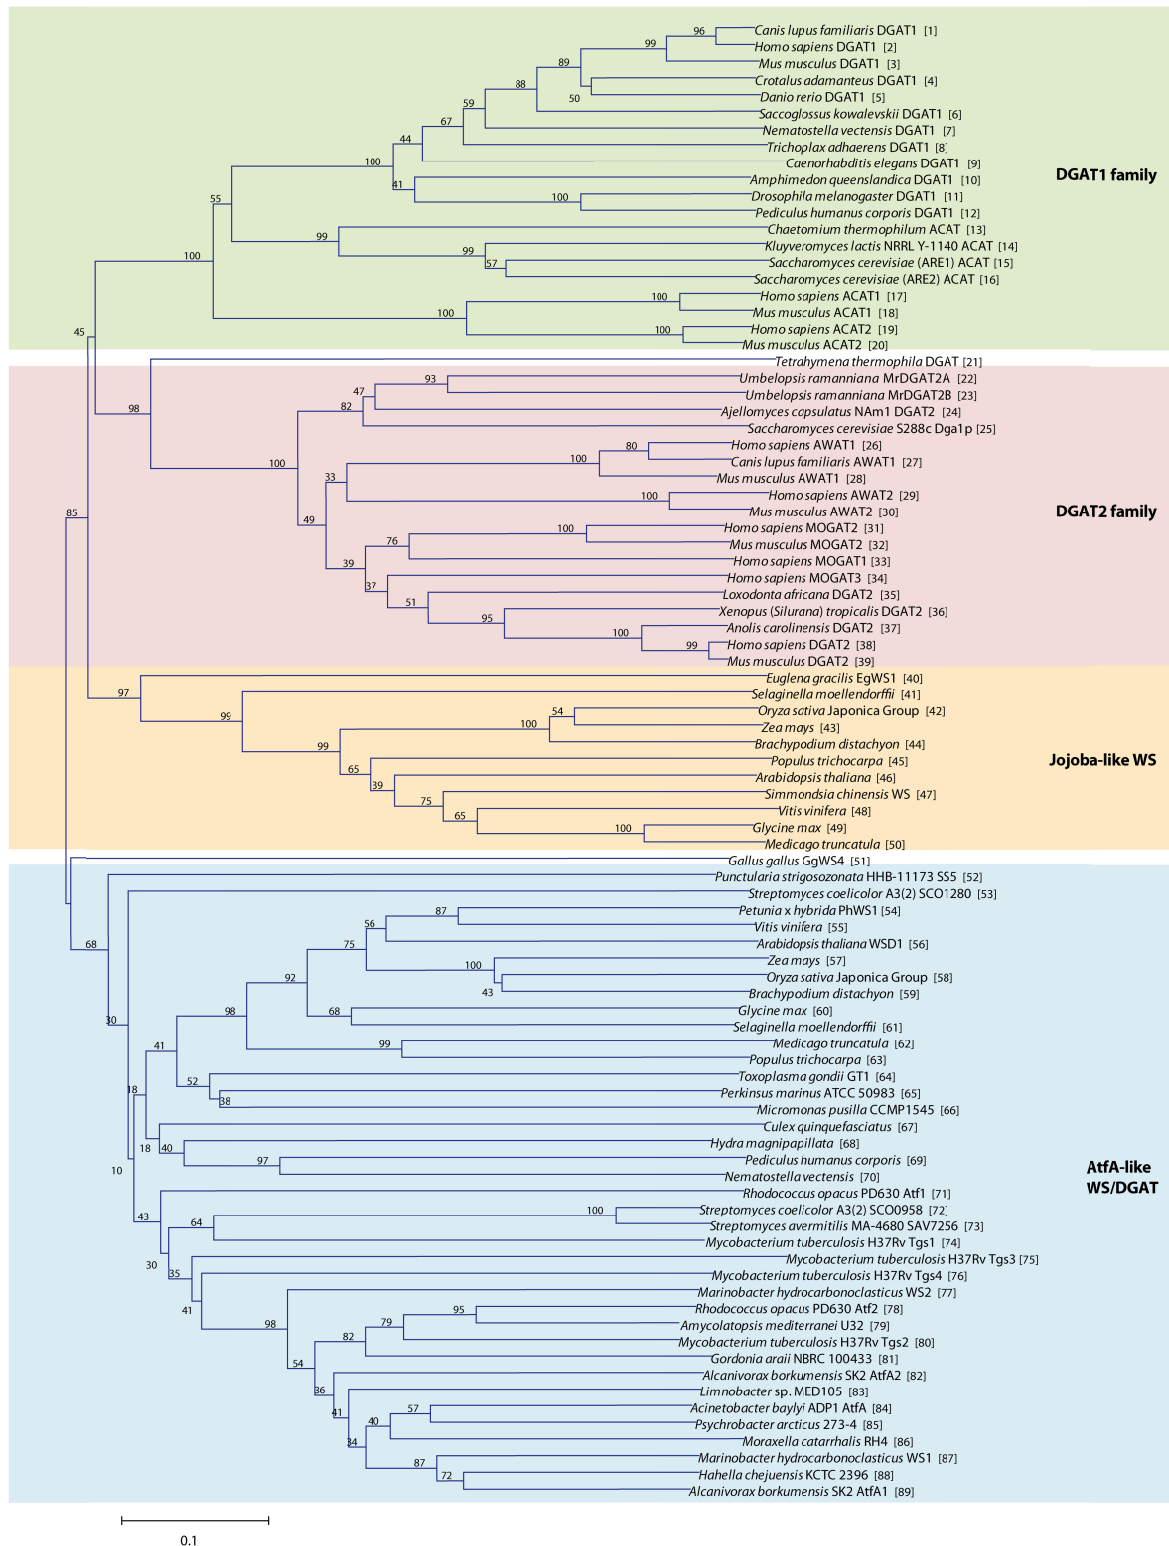

**Fig. S1** Phylogenetic tree of acyltransferases. Protein accession numbers: [1] XP 539214.2, [2] NP 036211.2, [3] NP 034176.1, [4] AFJ49921.1, [5] NP 956024.1, [6] XP 002736160.1, [7] XP 001639351.1, [8] XP 002112025.1, [9] NP 001256301.1, [10] XP 003389842.1, [11] NP

609813.1, [12] XP 002430154.1, [13] EGS17506.1, [14] XP 452607.1, [15] CAA42296.1, [16] CAA96298.1, [17] NP 003092.4, [18] NP 033256.2, [19] NP 003569.1, [20] NP 666176.1, [21] XP 001008104.1, [22] AAK84179.1, [23] AAK84180.1, [24] XP 001540241.1, [25] NP 014888.1, [26] NP 001013597.1, [27] XP 549058.2, [28] NP 001074605.1, [29] NP 001002254.1, [30] NP 808414.2, [31] NP 079374.2, [32] AAH52831.1, [33] NP 477513.2, [34] NP 835470.1, [35] XP 003412732.1, [36] XP 002934939.1, [37] XP 003225477.1, [38] NP 115953.2, [39] NP 080660.1, [40] ADI60058.1, [41] XP 002983828.1, [42] NP 001046772.1, [43] NP 001147171.1, [44] XP 003576211.1, [45] XP 002314065.1, [46] NP 200349.1, [47] AAD38041.1, [48] XP 002276902.1, [49] XP 003530771.1, [50] AFK35478.1, [51] XP 419207.1, [52] EIN09069.1, [53] NP 625567.1, [54] AAZ08051.1, [55] XP 002268615.1, [56] AED94163.1, [57] NP 001140997.1, [58] EEE55448.1, [59] XP 003571568.1, [60] ACU20370.1, [61] XP 002987493.1, [62] XP 003623995.1, [63] XP 002323706.1, [64] EEE25493.1, [65] XP 002765455.1, [66] XP 003059244.1, [67] XP 001847517.1, [68] XP 002155609.1, [69] XP 002429016.1, [70] XP 001632004.1, [71] ACX81314.1, [72] NP 625255.1, [73] NP 828432.1, [74] NP 217646.1, [75] NP 217751.1, [76] NP 217604.1, [77] ABO21021.1, [78] EHI41112.1, [79] YP 003769971.1, [80] NP 218251.1, [81] ZP 09211433.1, [82] YP 693524.1, [83] ZP 01914209.1, [84] AAO17391.1, [85] YP 263530.1, [86] YP 003627553.1, [87] ABO21020.1, [88] YP 436128.1, [89] YP 694462.1

**Table S1** Putative AtfA-like proteins in animals.

| Organism                          | Phylum       | Class                 | Accession №    | Size (amino acids) | Max. identity (similarity) <sup>a</sup> |
|-----------------------------------|--------------|-----------------------|----------------|--------------------|-----------------------------------------|
| <i>Hydra magnipapillata</i>       | Cnidaria     | Hydrozoa              | XP_002155609.1 | 491                | 25% (44%)                               |
| <i>Nematostella vectensis</i>     | Cnidaria     | Anthozoa              | XP_001632004.1 | 526                | 24% (41%)                               |
|                                   |              |                       | XP_001633379.1 | 490                | 23% (40%)                               |
|                                   |              |                       | XP_001632267.1 | 556                | 22% (39%)                               |
|                                   |              |                       | XP_002736281.1 | 751                | 23% (44%)                               |
| <i>Saccoglossus kowalevskii</i>   | Hemichordata |                       | XP_002736281.1 | 751                | 23% (44%)                               |
| <i>Pediculus humanus corporis</i> | Arthropoda   | Insecta               | XP_002429016.1 | 389                | 23% (41%)                               |
| <i>Metaseiulus occidentalis</i>   | Arthropoda   | Arachnida (mite)      | XP_003742738.1 | 1198               | 20% (40%)                               |
| <i>Danaus plexippus</i>           | Arthropoda   | Insecta (butterfly)   | EHJ69373.1     | 560                | 25% (45%)                               |
| <i>Culex quinquefasciatus</i>     | Arthropoda   | Insecta (mosquito)    | XP_001847517.1 | 512                | 22% (42%)                               |
|                                   |              |                       | XP_001868729.1 | 657                | 23% (43%)                               |
|                                   |              |                       | XP_001847515.1 | 595                | 22% (42%)                               |
| <i>Ixodes scapularis</i>          | Arthropoda   | Arachnida (deer tick) | XP_002416346.1 | 411                | 19% (40%)                               |

<sup>a</sup> Maximal percentage of identical or similar amino acids in comparison to the reference protein sequence of AtfA from *A. baylyi* strain ADP1.

**Table S2** Putative AtfA-like proteins in fungi.

| Organism                                        | Phylum        | Class              | Accession No   | Size (amino acids) | Max. identity (similarity) <sup>a</sup> |
|-------------------------------------------------|---------------|--------------------|----------------|--------------------|-----------------------------------------|
| <i>Ustilago maydis</i> 521                      | Basidiomycota | Ustilaginomycetes  | XP_758106.1    | 795                | 23% (39%)                               |
| <i>Ustilago hordei</i>                          | Basidiomycota | Ustilaginomycetes  | CCF53109.1     | 763                | 24% (40%)                               |
| <i>Sporisorium reilianum</i> SRZ2               | Basidiomycota | Microbotryomycetes | CBQ72199.1     | 774                | 24% (39%)                               |
| <i>Punctularia strigosozonata</i> HHB-11173 SS5 |               | Agaricomycetes     | EIN09069.1     | 539                | 21% (39%)                               |
| <i>Malassezia globosa</i> CBS 7966              |               | Exobasidiomycetes  | XP_001731626.1 | 725                | 19% (36%)                               |

<sup>a</sup> Maximal percentage of identical or similar amino acids in comparison to the reference protein sequence of AtfA from *A. baylyi* strain ADP1.

**Table S3** Putative AtfA-like proteins in plants.

| Organism                       | Family       | Accession №                                    | Size (amino acids) | Max. identity (similarity) <sup>a</sup> |     |           |
|--------------------------------|--------------|------------------------------------------------|--------------------|-----------------------------------------|-----|-----------|
| <i>Petunia hybrida</i>         | Solanaceae   | AAZ08051.1                                     | 521                | 22% (40%)                               |     |           |
| <i>Arabidopsis thaliana</i>    | Brassicaceae | NP_197139.1                                    | 488                | 22% (42%)                               |     |           |
|                                |              | NP_190488.1                                    | 522                | 20% (40%)                               |     |           |
|                                |              | NP_177356.1                                    | 479                | 21% (40%)                               |     |           |
|                                |              | NP_197641.1                                    | 482                | 23% (38%)                               |     |           |
|                                |              | BAB09801.1                                     | 485                | 21% (41%)                               |     |           |
|                                |              | BAC42871.1                                     | 486                | 21% (41%)                               |     |           |
|                                |              | NP_200151.2                                    | 486                | 21% (41%)                               |     |           |
|                                |              | NP_200150.1                                    | 483                | 22% (40%)                               |     |           |
|                                |              | BAB09102.1                                     | 499                | 22% (41%)                               |     |           |
|                                |              | NP_568547.1                                    | 481                | 22% (41%)                               |     |           |
|                                |              | NP_001185377.1                                 | 470                | 21% (39%)                               |     |           |
|                                |              | NP_568275.1                                    | 480                | 22% (38%)                               |     |           |
|                                |              | NP_190490.1                                    | 518                | 20% (39%)                               |     |           |
|                                |              | <i>Arabidopsis lyrata</i> subsp. <i>lyrata</i> | Brassicaceae       | XP_002871716.1                          | 477 | 20% (42%) |
|                                |              |                                                |                    | XP_002870738.1                          | 467 | 23% (42%) |
| XP_002865972.1                 | 488          |                                                |                    | 20% (39%)                               |     |           |
| XP_002873570.1                 | 480          |                                                |                    | 21% (40%)                               |     |           |
| XP_002864239.1                 | 481          |                                                |                    | 22% (39%)                               |     |           |
| XP_002877655.1                 | 521          |                                                |                    | 20% (39%)                               |     |           |
| XP_002868506.1                 | 500          |                                                |                    | 21% (39%)                               |     |           |
| XP_002879777.1                 | 474          |                                                |                    | 21% (40%)                               |     |           |
| <i>Thellungiella halophila</i> | Brassicaceae | XP_002877657.1                                 | 519                | 21% (39%)                               |     |           |
|                                |              | BAJ33896.1                                     | 467                | 19% (41%)                               |     |           |
| <i>Brachypodium distachyon</i> | Poaceae      | XP_003571568.1                                 | 507                | 23% (41%)                               |     |           |
|                                |              | XP_003571567.1                                 | 506                | 24% (43%)                               |     |           |
|                                |              | XP_003569567.1                                 | 516                | 22% (43%)                               |     |           |
|                                |              | XP_003571438.1                                 | 427                | 22% (43%)                               |     |           |
|                                |              | XP_003569566.1                                 | 519                | 22% (43%)                               |     |           |

**Table S3** (continued)

| Organism                                     | Family   | Accession №    | Size (amino acids) | Max. identity (similarity) <sup>a</sup> |
|----------------------------------------------|----------|----------------|--------------------|-----------------------------------------|
| <i>Brachypodium distachyon</i>               | Poaceae  | XP_003567157.1 | 503                | 21% (38%)                               |
|                                              |          | XP_003565936.1 | 534                | 19% (39%)                               |
| <i>Triticum aestivum</i>                     | Poaceae  | CBH32551.1     | 515                | 22% (42%)                               |
|                                              |          | CBH32550.1     | 489                | 23% (41%)                               |
| <i>Hordeum vulgare</i> subsp. <i>vulgare</i> | Poaceae  | BAJ97841.1     | 517                | 21% (43%)                               |
|                                              |          | BAJ93204.1     | 517                | 21% (43%)                               |
|                                              |          | BAJ93623.1     | 495                | 21% (41%)                               |
|                                              |          | BAJ85619.1     | 500                | 21% (39%)                               |
|                                              |          | BAK08349.1     | 504                | 20% (42%)                               |
|                                              |          | BAK02325.1     | 571                | 20% (38%)                               |
|                                              |          | BAJ84892.1     | 500                | 20% (38%)                               |
|                                              |          | NP_001043877.1 | 531                | 22% (40%)                               |
| <i>Oryza sativa</i> Japonica Group           | Poaceae  | NP_001044374.1 | 518                | 20% (38%)                               |
|                                              |          | EEE55448.1     | 437                | 21% (38%)                               |
|                                              |          | EAY98969.1     | 565                | 20% (40%)                               |
| <i>Oryza sativa</i> Indica Group             | Poaceae  | EAY75974.1     | 507                | 20% (38%)                               |
|                                              |          | EAY75973.1     | 518                | 20% (38%)                               |
|                                              |          | NP_001140997.1 | 369                | 21% (39%)                               |
| <i>Zea mays</i>                              | Poaceae  |                |                    |                                         |
| <i>Sorghum bicolor</i>                       | Poaceae  | XP_002440221.1 | 554                | 20% (38%)                               |
|                                              |          | XP_002458560.1 | 519                | 21% (38%)                               |
| <i>Medicago truncatula</i>                   | Fabaceae | XP_003623995.1 | 478                | 25% (41%)                               |
|                                              |          | XP_003607481.1 | 469                | 24% (41%)                               |
|                                              |          | XP_003588522.1 | 483                | 22% (40%)                               |
|                                              |          | XP_003607478.1 | 455                | 23% (40%)                               |
| <i>Glycine max</i>                           | Fabaceae | ACU20370.1     | 461                | 21% (42%)                               |
|                                              |          | XP_003529372.1 | 461                | 21% (42%)                               |
|                                              |          | XP_003534230.1 | 479                | 22% (41%)                               |
|                                              |          | XP_003534457.1 | 471                | 24% (40%)                               |
|                                              |          | XP_003552517.1 | 467                | 23% (40%)                               |

**Table S3** (continued)

| Organism                   | Family     | Accession №    | Size (amino acids) | Max. identity (similarity) <sup>a</sup> |
|----------------------------|------------|----------------|--------------------|-----------------------------------------|
| <i>Glycine max</i>         | Fabaceae   | XP_003541905.1 | 468                | 20% (39%)                               |
|                            |            | NP_001241558.1 | 469                | 21% (38%)                               |
|                            |            | XP_003539933.1 | 470                | 22% (39%)                               |
|                            |            | XP_003527429.1 | 471                | 22% (39%)                               |
|                            |            | XP_003540916.1 | 478                | 20% (39%)                               |
| <i>Vitis vinifera</i>      | Vitaceae   | XP_002268615.1 | 490                | 23% (40%)                               |
|                            |            | CBI40540.3     | 531                | 24% (39%)                               |
|                            |            | XP_003633939.1 | 607                | 24% (39%)                               |
|                            |            | XP_002263196.1 | 477                | 23% (40%)                               |
|                            |            | CAN71951.1     | 513                | 23% (40%)                               |
|                            |            | XP_002263137.1 | 513                | 23% (40%)                               |
|                            |            | CBI40547.3     | 1045               | 23% (39%)                               |
|                            |            | XP_003633938.1 | 607                | 23% (39%)                               |
|                            |            | XP_002263252.1 | 508                | 23% (39%)                               |
|                            |            | CBI40536.3     | 479                | 23% (38%)                               |
|                            |            | XP_003633936.1 | 473                | 20% (41%)                               |
|                            |            | XP_002263409.1 | 514                | 23% (38%)                               |
|                            |            | XP_002278404.1 | 513                | 21% (41%)                               |
|                            |            | XP_003633940.1 | 617                | 22% (40%)                               |
|                            |            | CBI40544.3     | 531                | 23% (39%)                               |
|                            |            | XP_003633941.1 | 511                | 20% (38%)                               |
|                            |            | CBI21867.3     | 494                | 20% (38%)                               |
| <i>Populus trichocarpa</i> | Salicaceae | XP_002274522.1 | 473                | 20% (38%)                               |
|                            |            | XP_002323706.1 | 473                | 22% (39%)                               |
|                            |            | XP_002318416.1 | 482                | 21% (39%)                               |
|                            |            | XP_002325937.1 | 496                | 20% (42%)                               |
|                            |            | XP_002323911.1 | 422                | 23% (41%)                               |
|                            |            | XP_002310400.1 | 474                | 20% (38%)                               |
|                            |            | XP_002323705.1 | 473                | 23% (39%)                               |

**Table S3** (continued)

| Organism                                          | Family          | Accession №    | Size (amino acids) | Max. identity (similarity) <sup>a</sup> |
|---------------------------------------------------|-----------------|----------------|--------------------|-----------------------------------------|
| <i>Populus trichocarpa</i>                        | Salicaceae      | XP_002328965.1 | 455                | 22% (37%)                               |
| <i>Ricinus communis</i>                           | Euphorbiaceae   | XP_002523348.1 | 506                | 22% (40%)                               |
|                                                   |                 | XP_002517893.1 | 483                | 22% (39%)                               |
| <i>Physcomitrella patens</i> subsp. <i>patens</i> | Funariaceae     | XP_001780431.1 | 497                | 22% (40%)                               |
| <i>Selaginella moellendorffii</i>                 | Selaginellaceae | XP_002987493.1 | 452                | 23% (44%)                               |
|                                                   |                 | XP_002992800.1 | 468                | 23% (44%)                               |
|                                                   |                 | XP_002988280.1 | 512                | 22% (38%)                               |
|                                                   |                 | XP_002963877.1 | 512                | 22% (38%)                               |

<sup>a</sup> Maximal percentage of identical or similar amino acids in comparison to the reference protein sequence of AtfA from *A. baylyi* strain ADP1.



**Table S4** Putative AtfA-like proteins in protists.

| Organism                                     | Kingdom        | Phylum           | Accession No   | Size (amino acids) | Max. identity (similarity) <sup>a</sup> |
|----------------------------------------------|----------------|------------------|----------------|--------------------|-----------------------------------------|
| <i>Perkinsus marinus</i> ATCC 50983          | Chromalveolata | Perkinsozoa      | XP_002765455.1 | 486                | 27% (45%)                               |
|                                              |                |                  | XP_002785958.1 | 449                | 25% (41%)                               |
|                                              |                |                  | XP_002787542.1 | 495                | 25% (41%)                               |
|                                              |                |                  | XP_002767852.1 | 495                | 23% (41%)                               |
|                                              |                |                  | XP_002783220.1 | 494                | 22% (43%)                               |
|                                              |                |                  | XP_002766051.1 | 494                | 23% (43%)                               |
|                                              |                |                  | XP_002785645.1 | 517                | 23% (38%)                               |
| <i>Phaeodactylum tricornutum</i> CCAP 1055/1 | Chromalveolata | Heterokontophyta | XP_002184474.1 | 504                | 20% (40%)                               |
| <i>Aureococcus anophagefferens</i>           | Chromalveolata | Heterokontophyta | EGB03968.1     | 505                | 23% (41%)                               |
| <i>Phytophthora sojae</i>                    | Chromalveolata | Heterokontophyta | EGZ11598.1     | 496                | 21% (45%)                               |
| <i>Thalassiosira oceanica</i>                | Chromalveolata | Heterokontophyta | EJK75121.1     | 630                | 23% (39%)                               |
| <i>Toxoplasma gondii</i> GT1                 | Chromalveolata | Apicomplexa      | EEE25493.1     | 670                | 22% (40%)                               |
| <i>Toxoplasma gondii</i> ME49                | Chromalveolata | Apicomplexa      | XP_002364905.1 | 670                | 22% (40%)                               |
| <i>Toxoplasma gondii</i> VEG                 | Chromalveolata | Apicomplexa      | EEE32548.1     | 670                | 22% (40%)                               |
| <i>Capsaspora owczarzaki</i> ATCC 30864      |                |                  | EFW44455.1     | 596                | 22% (45%)                               |
|                                              |                |                  | EFW44815.1     | 920                | 24% (40%)                               |
| <i>Naegleria gruberi</i>                     |                | Percolozoa       | XP_002677788.1 | 710                | 22% (42%)                               |
|                                              |                |                  | XP_002671612.1 | 515                | 22% (37%)                               |
| <i>Ostreococcus lucimarinus</i> CCE9901      |                |                  | XP_001419779.1 | 345                | 22% (41%)                               |
| <i>Entamoeba histolytica</i> HM-1:IMSS       |                | Amoebozoa        | XP_001914129.1 | 437                | 20% (43%)                               |
| <i>Entamoeba dispar</i> SAW760               |                | Amoebozoa        | XP_001738032.1 | 493                | 19% (38%)                               |
| <i>Micromonas pusilla</i> CCMP1545           | Viridiplantae  | Mamiellaceae     | XP_003059244.1 | 503                | 23% (42%)                               |
| <i>Micromonas</i> sp. RCC299                 | Viridiplantae  | Mamiellaceae     | XP_002502575.1 | 360                | 21% (42%)                               |

<sup>a</sup> Maximal percentage of identical or similar amino acids in comparison to the reference protein sequence of AtfA from *A. baylyi* strain ADP1.
